# Supplementary material for: Yolk-sac-derived macrophages progressively expand in the mouse kidney with age
Source: eLife. 2020 Apr 17;9:e51756. doi: 10.7554/eLife.51756 (PMC7205460; doi:10.7554/eLife.51756)
Supplement: Figure 1—source data 1. [file elife-51756-fig1-data1.xlsx]

## Sheet: Fig1-so-1
Cortex					Outer medulla					Inner medulla
P0	2wks	2mo	6mo		P0	2wks	2mo	6mo		P0	2wks	2mo	6mo
5	5.55556	38.0952	78.2609		8.92857	19.2308	40	94.4828		5	18.5185	38.7387	51.3513
3.77359	13.0435	31.5789	73.913		10.7143	14.2857	32.4324	77.7108		8.47458	13.3721	27.8195	60
2.38095	11.7647	39.6104	76		11.6279	19.6581	25.7143	82.7338		4.34783	10.7383	23.0769	47.0588
3.88349	10.7527	36.5079	82.6923		8.33333		38.4615				17.8571	19.8113
5.47945		42.8571			7.69231		37.5					46.0318
2.7027		26.4151
3.92157		56
6.66667		56.6667
