# Supplementary material for: Yolk-sac-derived macrophages progressively expand in the mouse kidney with age
Source: eLife. 2020 Apr 17;9:e51756. doi: 10.7554/eLife.51756 (PMC7205460; doi:10.7554/eLife.51756)
Supplement: Figure 2—source data 1. [file elife-51756-fig2-data1.xlsx]

## Sheet: Fig2-so-1
2month Cortex	6month Cortex	2month Outer medulla	6month Outer medulla	2month Inner medulla	6month Inner medulla
41.9853	37.9181	30.4647	20.7761	29.5964	32.1176
50.2412	14.9478	29.8636	18.3926	45	21.6681
44.4869	28.8285	35.404	5.34759	41.242	25.6528
38.5714	24.0869	34.5118	12.8828	30.9144	18.8757
40.8627		37.7508		27.3973
