# Supplementary material for: Yolk-sac-derived macrophages progressively expand in the mouse kidney with age
Source: eLife. 2020 Apr 17;9:e51756. doi: 10.7554/eLife.51756 (PMC7205460; doi:10.7554/eLife.51756)
Supplement: Figure 3—source data 1. [file elife-51756-fig3-data1.xlsx]

## Sheet: Fig3-so-1
Ki67
P0 tdt+	P0 tdt–	2wks tdt+	2wks tdt–	2mo tdt+	2mo tdt–	6mo tdt+	6mo tdt–
10.5263	6.99588	8.33333	2.45499	3.50877	2.86458	2.5641	0.884956
10.7143	9.96	9.09091	3.33731	3.88889	0.890869	1.41844	0.555556
9.83607	8.70712	10.8108	5.9542	1.80587	1.36139	1.24481	1.09409
		10.1695	2.8907	1.48809	0.686275
				1.89873	0.555556
				2.64901	0.44843
