# Supplementary material for: Yolk-sac-derived macrophages progressively expand in the mouse kidney with age
Source: eLife. 2020 Apr 17;9:e51756. doi: 10.7554/eLife.51756 (PMC7205460; doi:10.7554/eLife.51756)
Supplement: Figure 4—source data 1. [file elife-51756-fig4-data1.xlsx]

## Sheet: Fig4-so-1
Ki67+
	Cx3cr1CreERt;Rosa26tdTomato
38.4615	2.38095
23.0769	2.77778
18.1818	3.125
34.4828	4.34783
